# Supplementary material
Source: PubMed Central journal article supplement (PMC3811476)
Supplement: AAC.00418-13_zac010132204so1.pdf [file AAC.00418-13_zac010132204so1.pdf]

## Supplementary Tables

Supplementary Table 1. Strains and plasmids used in this study

|                   | Description                                                           | Source        |
|-------------------|-----------------------------------------------------------------------|---------------|
| Strains           |                                                                       |               |
| R6                | Wild type                                                             | ATCC BAA 255  |
| R6M2B             | R6 clone selected from CIP resistance                                 | This work     |
| T5-R6M2B          | R6 clone transform with gDNA from R6M2B selected for CIP resistance   | This work     |
| T1-60827          | R6 clone transformed with gDNA from 60827 selected for CIP resistance | This work     |
| 14599             | clinical isolate                                                      | Dr. GG Zhanel |
| 14635             | clinical isolate                                                      | Dr. GG Zhanel |
| 14636             | clinical isolate                                                      | Dr. GG Zhanel |
| 64933             | clinical isolate                                                      | Dr. GG Zhanel |
| 45089             | clinical isolate                                                      | Dr. GG Zhanel |
| 51597             | clinical isolate                                                      | Dr. GG Zhanel |
| 59774             | clinical isolate                                                      | Dr. GG Zhanel |
| 60827             | clinical isolate                                                      | Dr. GG Zhanel |
| 60911             | clinical isolate                                                      | Dr. GG Zhanel |
| 45693             | clinical isolate                                                      | Dr. GG Zhanel |
| 60827             | clinical isolate                                                      | Dr. GG Zhanel |
| R6 pFF60043       | R6 transformed with plasmid pFF60043, KAN <sup>r</sup>                | This work     |
| R6M2B pFF6patA    | R6 transformed with plasmid pFF6patA, KAN <sup>r</sup>                | This work     |
| R6M2B pFF6patB    | R6 transformed with plasmid pFF6patB, KAN <sup>r</sup>                | This work     |
| R6M2B pFF60043    | R6M2B transformed with plasmid pFF60043, KAN <sup>r</sup>             | This work     |
| R6M2B pFF6patA    | R6M2B transformed with plasmid pFF6patA, KAN <sup>r</sup>             | This work     |
| R6M2B pFF6patB    | R6M2B transformed with plasmid pFF6patB, KAN <sup>r</sup>             | This work     |
| T5-R6M2B pFF60043 | T5-R6M2B transformed with plasmid pFF60043, KAN <sup>r</sup>          | This work     |
| T5-R6M2B pFF6patA | T5-R6M2B transformed with plasmid pFF6patA, KAN <sup>r</sup>          | This work     |
| T5-R6M2B pFF6patB | T5-R6M2B transformed with plasmid pFF6patB, KAN <sup>r</sup>          | This work     |
| T1-60827 pFF30043 | T1-60827 transformed with plasmid pFF30043, CM <sup>r</sup>           | This work     |
| T1-60827 pFF3patA | T1-60827 transformed with plasmid pFF3patA, CM <sup>r</sup>           | This work     |
| T1-60827 pFF3patB | T1-60827 transformed with plasmid pFF3patA, CM <sup>r</sup>           | This work     |

|                                               |                                                                                                                                                                |                  |
|-----------------------------------------------|----------------------------------------------------------------------------------------------------------------------------------------------------------------|------------------|
| 60827<br>pFF30043                             | 60827 transformed with plasmid pFF30043, CM <sup>r</sup>                                                                                                       | This work        |
| 60827<br>pFF3patA                             | 60827 transformed with plasmid pFF3patA, CM <sup>r</sup>                                                                                                       | This work        |
| 60827<br>pFF3patB                             | 60827 transformed with plasmid pFF3patB, CM <sup>r</sup>                                                                                                       | This work        |
| R6 <sup>parC-R6M2B</sup>                      | R6 transformed with <i>parC</i> PCR fragment from R6M2B                                                                                                        | This work        |
| R6 <sup>spr1902-T5R6M2B,smR</sup>             | R6 transformed with <i>spr1902</i> PCR fragment from T5-R6M2B and <i>rpsL</i> <sup>+</sup> streptomycin resistance marker, SM <sup>r</sup>                     | This work        |
| R6 <sup>parC, gyrA-R6M2B</sup>                | R6 <sup>parC</sup> transformed with <i>gyrA</i> PCR fragments from R6M2B                                                                                       | This work        |
| R6 <sup>parC, gyrA, spr1902-T5R6M2B,smR</sup> | R6 <sup>parC,gyrA-R6M2B</sup> co-transformed with <i>spr1902</i> PCR fragment from T5-R6M2B and <i>rpsL</i> <sup>+</sup> , SM <sup>r</sup>                     | This work        |
| R6 <sup>parC, gyrA, spr1544-T5R6M2B,smR</sup> | R6 <sup>parC,gyrA-R6M2B</sup> co-transformed with <i>spr1544</i> PCR fragment from T5-R6M2B and <i>rpsL</i> <sup>+</sup> , SM <sup>r</sup>                     | This work        |
| R6 <sup>patB,T1-60827,smR</sup>               | R6 co-transformed with <i>patB</i> fragment from T1-60827 and <i>rpsL</i> <sup>+</sup> ( contain mutations <b>T142G</b> ;T357C; T618C;C1260T), SM <sup>r</sup> | This work        |
| R6 <sup>patA,T1-60827,smR</sup>               | R6 co-transformed with <i>patB</i> fragment from T1-60827 and <i>rpsL</i> <sup>+</sup> ( contain mutations <b>G335T</b> ; T537C; A540C; C660T) SM <sup>r</sup> | This work        |
| T5-R6M2B <sup>spr0335R6,smR</sup>             | T5-R6M2B co-transformed with <i>spr0335</i> PCR fragment from R6 and <i>rpsL</i> <sup>+</sup> , SM <sup>r</sup>                                                | This work        |
| R6M2B <sup>spr0129R6,smR</sup>                | R6M2B co-transformed with <i>spr0129</i> PCR fragment from R6 and <i>rpsL</i> <sup>+</sup> , SM <sup>r</sup>                                                   | This work        |
| Plasmids                                      |                                                                                                                                                                |                  |
| pFF3                                          | <i>S. pneumoniae</i> non-replicative vector that contains a CM <sup>r</sup> resistance marker                                                                  | Unpublished data |
| pFF6                                          | pFF3 in which the CM <sup>r</sup> resistance marker was replaced with a KM <sup>r</sup> resistance marker.                                                     | Unpublished data |
| pFF60043                                      | plasmid pFF6(KAN <sup>r</sup> ) containing a fragment of <i>spr0043</i> amplified from R6                                                                      | This work        |
| pFF6patA                                      | pFF6(KAN <sup>r</sup> ) containing a fragment of <i>patA</i> ( <i>spr1887</i> ) amplified from R6                                                              | This work        |
| pFF6patB                                      | pFF6(KAN <sup>r</sup> ) containing a fragment of <i>patB</i> ( <i>spr1885</i> ) amplified from R6                                                              | This work        |
| pFF30043                                      | pFF3(CM <sup>r</sup> ) containing a fragment of <i>patA</i> ( <i>spr1887</i> ) amplified from 60827                                                            | This work        |
| pFF3patA                                      | plasmid pFF3(CM <sup>r</sup> ) containing a fragment of <i>patA</i> ( <i>spr1887</i> ) amplified from 60827                                                    | This work        |
| pFF3patB                                      | Plasmid pFF3(CM <sup>r</sup> ) containing a fragment of <i>patB</i> ( <i>spr1885</i> ) amplified from 60827                                                    | This work        |

---

Abbreviations: CIP: Ciprofloxacin; KAN: Kanamycin; CM: Chloramphenicol; SM: streptomycin; CRI; Centre de Recherche en Infectiologie

Supplementary Table 2. Primers used in this study

| <b>Primers</b>                | <b>Primer sequences</b>     |
|-------------------------------|-----------------------------|
| <b>Genes inactivations</b>    |                             |
| <i>patBF</i> -KO              | CCAACCTCCAGCAGAAAGAG        |
| <i>patBR</i> -KO              | CCTGACTAGCATCTGGCACA        |
| <i>patAF</i> -KO              | GGGGTACCGTTGGTTCATCGCTTCTTT |
| <i>patAR</i> -KO              | CGGGATCCATCCTTTGTTTTGTCCACC |
| spr0043F-KO                   | GGGAGATATGACCTTCAAGC        |
| spr0043R-KO                   | AAACTGCTAGTCGCCTCATC        |
| <b>Mutants reconstruction</b> |                             |
| parC-F                        | TGGGTTGAAGCCGGTTCA          |
| parC-R                        | CAAGACCGTTGGTTCTTTC         |
| gyrA-F                        | TTCTCTACGGAATGAATG          |
| gyrA-R                        | GATATCACGAAGCATTTCAG        |
| spr0129(L)-F                  | TGTTGCTTGCGTTTATGGAG        |
| spr0129(L)-R                  | TGATAGAGAAATTTTTATGA        |
| spr1902-F                     | ATGGAAAACAAACCGTCGCCGT      |
| spr1902-R                     | TTAAGACCACTCATTTTCTGC       |
| spr1902(L)-F                  | CCATATTGAAGGCCAAGTCCT       |
| spr1902(L)-R                  | GTTGCAGCTGCCTTTGATATGG      |
| spr0335(L)-F                  | TGACCGTTTTGGCGCTTGTATC      |
| spr0335(L)-R                  | ATTTTGTAGCTGACCATTGA        |
| spr1544(L)-F                  | TTCAGTTCTGTTTTTCAATATCG     |
| spr1544(L)-R                  | TGGTACGACCTGTAAATTGGT       |
| <i>uppatA</i> -F              | AAACCAAGACTCACTAGTTA        |
| <i>patB</i> -R                | TTATTTCGAAAACAAATTGATTGTG   |
| <b>qRT-PCR</b>                |                             |
| RT16sRNA-F                    | CCTATTGTTAGTTGCCATCATTTCAG  |
| RT16srRNA-R                   | GACTCGTTGTACCAGCCATTGT      |
| <i>RTpatA</i> -R              | GGTGGCAAGGATATTCGAGA        |
| <i>RTpatA</i> -R              | AGAATGGCACGTTGGAGAAC        |
| <i>RTpatB</i> -F              | GCCTTTACTGGAGCTGAACG        |
| <i>RTpatB</i> -R              | AGGTTGGAGCCTTTTCAGGT        |
| RTspr0081-F                   | CCTACTACGAAGCAGCGACAG       |
| RTspr0081-R                   | TACAAGCGGAGTCAACTGAGG       |
| RTspr1884-F                   | CGGTGTCCAACCTTGTC AATG      |
| RTspr1884-R                   | GAGTGAGATGTCCCGAAAGG        |

Abbreviation: F: Forward; R: Reverse;(L): Long fragment; up: upstream; qRT-PCR: quantitative real-time PCR.

Supplementary Table 3. Reversion of the efflux phenotype by reserpine.

| <b>Strains</b>                               | <b>CIP MIC <math>\mu\text{g/mL}</math></b> |            |          |           |           |
|----------------------------------------------|--------------------------------------------|------------|----------|-----------|-----------|
|                                              | <b>0</b>                                   | <b>2.5</b> | <b>5</b> | <b>10</b> | <b>20</b> |
| <b><math>\mu\text{g/mL}</math> reserpine</b> |                                            |            |          |           |           |
| R6                                           | 0.5                                        | 0.5        | 0.5      | 0.5       | 0.5       |
| T1-60827                                     | 2                                          | 0.5        | 0.5      | 0.5       | 0.5       |
| 60827                                        | 2                                          | 1          | 1        | 0.5       | 0.5       |
| R6M2B                                        | 128                                        | 64         | 64       | 32        | 32        |
| T5-R6M2B                                     | 128                                        | 64         | 64       | 32        | 32        |

Supplementary Table 4: QRDRs mutations, *patA* expression and CIP MIC in *S. pneumoniae* clinical isolates.

| Strains | QRDRs mutations |              | <i>patA</i> expression <sup>a</sup> | MIC(ug/mL) <sup>b</sup> |       |
|---------|-----------------|--------------|-------------------------------------|-------------------------|-------|
|         | <i>gyrA</i>     | <i>parC</i>  |                                     | CIP                     | CIP+R |
| 14599   |                 |              | 1.1±0.25                            | 0.5                     | 0.5   |
| 14635   |                 |              | 1.4±0.3                             | 0.5                     | 0.5   |
| 14636   |                 |              | 0.734±0.169                         | 0.5                     | 0.5   |
| 64933   |                 |              | 1.13±0.04                           | 1                       | 1     |
| 45089   |                 | <i>K137N</i> | 1.14±0.234                          | 1                       | 1     |
| 51597   |                 | <i>S79F</i>  | 8.87±1.356                          | 8                       | 2     |
| 59774   |                 |              | 11.13±2.347                         | 4                       | 0.5   |
| 60911   |                 |              | 11.09±2.67                          | 4                       | 0.5   |
| 45693   | <i>S81F</i>     | <i>S79F</i>  | 6.98±0.03                           | 128                     | 32    |

<sup>a</sup>As measured by qRT-PCR

<sup>b</sup>CIP(ciprofloxacin); R(reserpine 20ug/mL). MICs have been measured at least in triplicates.

**A**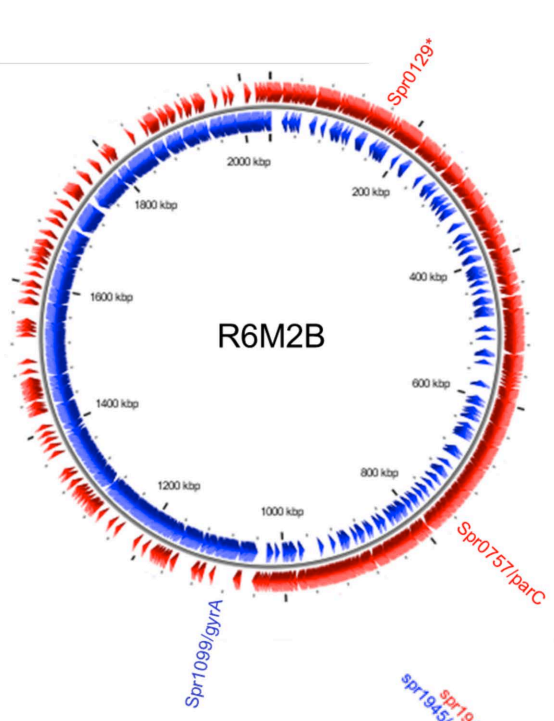**B**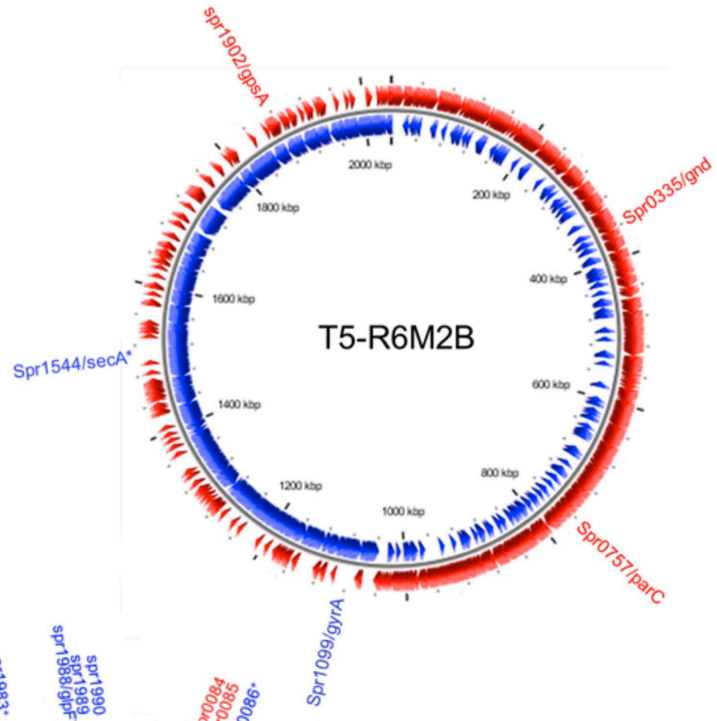**C**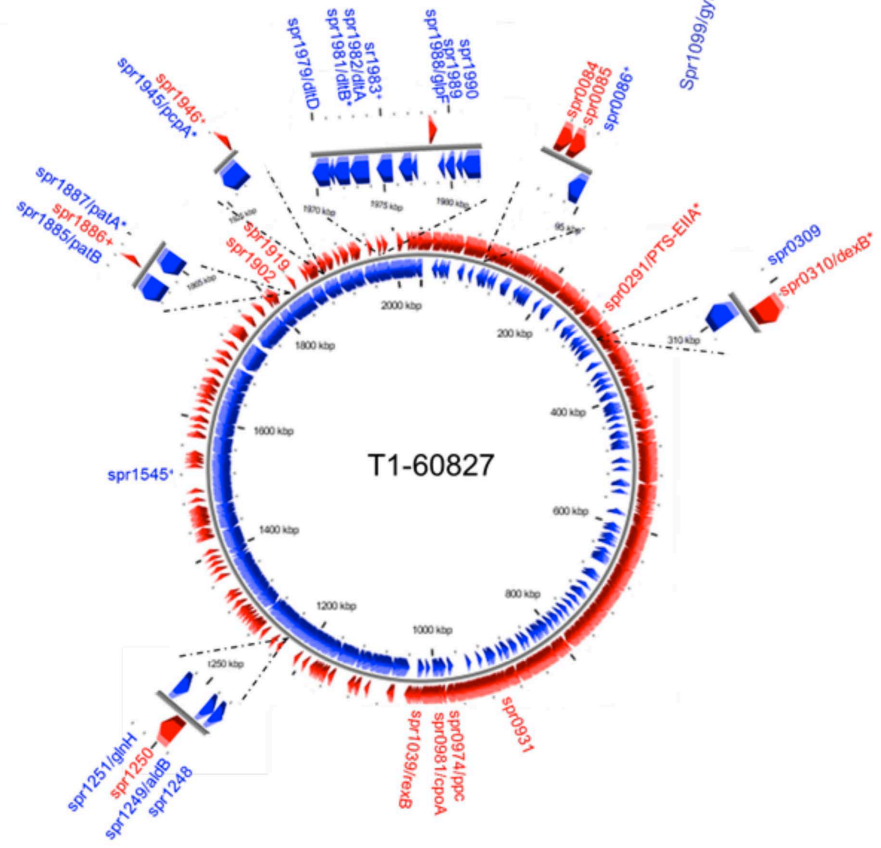

**Figure S1. Schematic representation (in CG view) of the genomic loci mutated in *S. pneumoniae* R6M2B (A), T5-R6M2B (B) and T1-60827 (C).** Genes indicated in red are encoded on the forward DNA strand and genes in blue are encoded on the reverse strand. Genes with an asterisk (\*) have mutation(s) in the region upstream of the ATG and genes with a plus symbol (†) have mutation(s) downstream of their coding region. Abbreviations: *parC*: DNA topoisomerase IV subunit A, *gyrA*: DNA gyrase subunit A, *gnd*: 6-phosphogluconate dehydrogenase, *secA*: preprotein translocase subunit SecA, *gpsA*: NAD(P)H-dependent glycerol-3-phosphate dehydrogenase, *PTS-EIIA*: PTS system IIA component, *dexB*: glucan 1,6- $\alpha$ -glucosidase, *ppc*: phosphoenolpyruvate carboxylase, *cpoA*: glycosyl transferase CpoA, *rexB*: second subunit of major exonuclease, *aldB*: alpha-acetolactate decarboxylase, *glnH*: amino acid ABC transporter amino acid-binding protein, *patB*: ABC transporter ATP-binding protein/permease, *patA*: ABC transporter ATP-binding protein/permease, *pcpA*: choline binding protein PcpA, *dltD*: D-alanine transfer from undecaprenol-phosphate to the poly(glycerophosphate) chain, *dltC*: D-alanine--poly(phosphoribitol) ligase subunit 2, *dltB*: D-alanine transfer from Dcp to undecaprenol-phosphate, *dltA*: D-alanine--poly(phosphoribitol) ligase subunit 1, *glpF*: glycerol uptake facilitator protein.
